# Supplementary material
Source: ML conference proceedings conference paper supplement (https://proceedings.neurips.cc/paper_files/paper/2011/hash/9f53d83ec0691550f7d2507d57f4f5a2-Abstract.html)
Supplement: Supplementary file [file 9f53d83ec0691550f7d2507d57f4f5a2-Supplemental.zip]

## Appendix A.1: Inference for MT-iLSVM

In this section, we provide the deviation of the inference algorithm for MT-iLSVM, which is outlined in Alg. 1 and detailed below.

For MT-iLSVM, the model  $\mathcal{M}$  consists of all the latent variables  $(\boldsymbol{\nu}, \mathbf{W}, \mathbf{Z}, \boldsymbol{\eta})$ . Let  $L_{mn}(p) \stackrel{\text{def}}{=} \mathbb{E}_p[\log p(\mathbf{x}_{mn} | \mathbf{Z}, \mathbf{w}_{mn}, \lambda_{mn}^2)]$  be the expected data likelihood. Then, under the truncated mean-field assumption (14), we have

$$L_{mn}(p) = -\frac{\mathbf{x}_{mn}^\top \mathbf{x}_{mn} - 2\mathbf{x}_{mn}^\top \mathbb{E}_p[\mathbf{Z}\mathbf{w}_{mn}] + \mathbb{E}_p[\mathbf{w}_{mn}^\top \mathbf{U}\mathbf{w}_{mn}]}{2\lambda_{mn}^2} - \frac{D \log(2\pi\lambda_{mn}^2)}{2},$$

where  $\mathbf{x}_{mn}^\top \mathbb{E}_p[\mathbf{Z}\mathbf{w}_{mn}] = \sum_k \mathbf{x}_{mn}^\top \boldsymbol{\psi}_{.k}$ ;  $\boldsymbol{\psi}_{.k} \stackrel{\text{def}}{=} (\psi_{1k} \cdots \psi_{Dk})^\top$  is the  $k$ th column of  $\boldsymbol{\psi} = \mathbb{E}[\mathbf{Z}]$ ;

$$\mathbb{E}_p[\mathbf{w}_{mn}^\top \mathbf{U}\mathbf{w}_{mn}] = 2 \sum_{j < k} \phi_{mn}^j \phi_{mn}^k \mathbf{U}_{jk} + \sum_k \mathbf{U}_{kk} (K\sigma_{mn}^2 + \Phi_{mn}^\top \Phi_{mn});$$

and  $\mathbf{U} \stackrel{\text{def}}{=} \mathbb{E}[\mathbf{Z}^\top \mathbf{Z}]$  is a  $K \times K$  matrix, whose element is

$$\mathbf{U}_{ij} = \begin{cases} \sum_d \psi_{di}, & \text{if } i = j \\ \sum_d \psi_{di} \psi_{dj}, & \text{otherwise.} \end{cases}$$

For the KL-divergence term, we have  $\text{KL}(p(\mathcal{M}) \| \pi(\mathcal{M})) = \text{KL}(p(\boldsymbol{\nu}) \| \pi(\boldsymbol{\nu})) + \text{KL}(p(\mathbf{W}) \| \pi(\mathbf{W})) + \text{KL}(p(\mathbf{Z}) \| \pi(\mathbf{Z})) + \text{KL}(p(\boldsymbol{\eta}) \| \pi(\boldsymbol{\eta}))$ , where the individual terms are

$$\begin{aligned} \text{KL}(p(\boldsymbol{\nu}) \| \pi(\boldsymbol{\nu})) &= \sum_{k=1}^K \left( (\gamma_{k1} - \alpha)(\psi(\gamma_{k1}) - \psi(\gamma_{k1} + \gamma_{k2})) + (\gamma_{k2} - 1)(\psi(\gamma_{k2}) - \psi(\gamma_{k1} + \gamma_{k2})) \right. \\ &\quad \left. - \log \frac{\Gamma(\gamma_{k1})\Gamma(\gamma_{k2})}{\Gamma(\gamma_{k1} + \gamma_{k2})} \right) - K \log \alpha, \end{aligned}$$

$$\begin{aligned} \text{KL}(p(\mathbf{Z}) \| \pi(\mathbf{Z})) &= \sum_{dk} \left( -\psi_{dk} \sum_{j=1}^k \mathbb{E}_p[\log \nu_j] - (1 - \psi_{dk}) \mathbb{E}_p[\log(1 - \prod_{j=1}^k \nu_j)] \right. \\ &\quad \left. + \psi_{dk} \log \psi_{dk} + (1 - \psi_{dk}) \log(1 - \psi_{dk}) \right) \end{aligned}$$

$$\text{KL}(p(\mathbf{W}) \| \pi(\mathbf{W})) = \sum_{mn} \left( \frac{K\sigma_{mn}^2 + \Phi_{mn}^\top \Phi_{mn}}{2\sigma_{m0}^2} - \frac{K(1 + \log \frac{\sigma_{mn}^2}{\sigma_{m0}^2})}{2} \right).$$

where  $\psi(\cdot)$  is the digamma function and  $\mathbb{E}_p[\log \nu_j] = \psi(\gamma_{j1}) - \psi(\gamma_{j1} + \gamma_{j2})$ . For  $\text{KL}(p(\boldsymbol{\eta}) \| \pi(\boldsymbol{\eta}))$ , we do not need to write it explicitly, as we shall see. Finally, the effective discriminant function is

$$f_m(\mathbf{x}_{mn}; p(\mathbf{Z}, \boldsymbol{\eta})) = \boldsymbol{\eta}_m^\top \boldsymbol{\psi}^\top \mathbf{x}_{mn} = \sum_{k=1}^K \mathbb{E}_p[\eta_{mk}] \boldsymbol{\psi}_{.k}^\top \mathbf{x}_{mn}.$$

All the above terms can be easily computed, except the term  $\mathbb{E}_p[\log(1 - \prod_{j=1}^k \nu_j)]$ . Here, we adopt the multivariate lower bound [9]

$$\mathbb{E}_p[\log(1 - \prod_{j=1}^k \nu_j)] \geq \sum_{m=1}^k q_{km} \psi(\gamma_{m2}) + \sum_{m=1}^{k-1} \left( \sum_{n=m+1}^k q_{kn} \right) \psi(\gamma_{m1}) - \sum_{m=1}^k \left( \sum_{n=m}^k q_{kn} \right) \psi(\gamma_{m1} + \gamma_{m2}) + \mathcal{H}(q_{k.}),$$

where the variational parameters  $q_{k.} = (q_{k1} \cdots q_{kk})^\top$  belong to the  $k$ -simplex, and  $\mathcal{H}(q_{k.})$  is the entropy of  $q_{k.}$ . The tightest lower bound is achieved by setting  $q_{k.}$  to be the optimum value

$$q_{km} = \frac{1}{Z_k} \exp \left( \psi(\gamma_{m2}) + \sum_{n=1}^{m-1} \psi(\gamma_{n1}) - \sum_{n=1}^m \psi(\gamma_{n1} + \gamma_{n2}) \right), \quad (17)$$

where  $Z_k$  is a normalization factor to make  $q_{k.}$  be a distribution. We denote the tightest lower bound by  $\mathcal{L}_k^\nu$ . Replacing the term  $\mathbb{E}_p[\log(1 - \prod_{j=1}^k \nu_j)]$  with its lower bound  $\mathcal{L}_k^\nu$ , we can have an upper bound of  $\text{KL}(p(\mathcal{M}) \| \pi(\mathcal{M}))$  and we denote this upper bound by  $\mathcal{L}(p)$ .

---

**Algorithm 1** Inference Algorithm of MT-iLSVM

---

- 1: **Input:** data  $\mathcal{D} = \{(\mathbf{x}_{mn}, y_{mn})\}_{m,n \in \mathcal{I}_v^m} \cup \{\mathbf{x}_{mn}\}_{m,n \in \mathcal{I}_u^m}$ , constants  $\alpha$  and  $C$
  - 2: **Output:** distributions  $p(\boldsymbol{\nu})$ ,  $p(\mathbf{Z})$ ,  $p(\mathbf{W})$ ,  $p(\boldsymbol{\eta})$  and hyper-parameters  $\sigma_{m0}^2$  and  $\lambda_{mn}^2$
  - 3: Initialize  $\gamma_{k1} = \alpha$ ,  $\gamma_{k2} = 1$ ,  $\psi_{dk} = 0.5 + \epsilon$ , where  $\epsilon \sim \mathcal{N}(0, 0.001)$ ,  $\Phi_{mn} = 0$ ,  $\sigma_{mn}^2 = \sigma_{m0}^2 = 1$ ,  $\mu_m = 0$ ,  $\lambda_{mn}^2$  is computed from  $\mathcal{D}$ .
  - 4: **repeat**
  - 5:   **repeat**
  - 6:     update  $(\gamma_{k1}, \gamma_{k2})$  using Eq. (19),  $\forall 1 \leq k \leq K$ ;
  - 7:     update  $\phi_{mn}^k$  and  $\sigma_{mn}^2$  using Eq. (18),  $\forall m, \forall n, \forall 1 \leq k \leq K$ ;
  - 8:     update  $\psi_{dk}$  using Eq. (20),  $\forall 1 \leq d \leq D, \forall 1 \leq k \leq K$ ;
  - 9:   **until** relative change of  $L$  is less than  $\tau$  (e.g.,  $1e^{-3}$ ) or iteration number is  $T$  (e.g., 10)
  - 10: **for**  $m = 1$  **to**  $M$  **do**
  - 11:   solve the dual problem (21) using a binary SVM learner.
  - 12: **end for**
  - 13:   update the hyper-parameters  $\sigma_{m0}^2$  using Eq. (22) and  $\lambda_{mn}^2$  using Eq. (23). (*Optional*)
  - 14: **until** relative change of  $L$  is less than  $\tau'$  (e.g.,  $1e^{-4}$ ) or iteration number is  $T'$  (e.g., 20)
- 

With the above terms and the upper bound  $\mathcal{L}(p)$ , we use the Lagrangian method with the Lagrangian multipliers  $\boldsymbol{\omega}$ , one for each margin constraint, and  $\mathbf{u}$  for the nonnegativity constraint of  $\boldsymbol{\xi}$ . We have the Lagrangian functional

$$L(p, \boldsymbol{\xi}, \boldsymbol{\omega}, \mathbf{u}) = \mathcal{L}(p) - \sum_{mn} L_{mn}(p) - \sum_{m,n \in \mathcal{I}_u^m} \omega_{mn} \left( y_{mn} (\mathbb{E}_p[\boldsymbol{\eta}_m]^\top \boldsymbol{\psi}^\top \mathbf{x}_{mn}) - 1 + \xi_{mn} \right) - \mathbf{u}^\top \boldsymbol{\xi}.$$

Then, the inference procedure iteratively solves the following steps:

**Infer  $p(\boldsymbol{\nu})$ ,  $p(\mathbf{Z})$  and  $p(\mathbf{W})$ :** For  $p(\mathbf{W})$ , since both the prior  $\pi(\mathbf{W})$  and  $p(\mathbf{W})$  are Gaussian, we can easily derive the update rules, similar as in Gaussian mixture models

$$\begin{aligned} \phi_{mn}^k &= \frac{\sum_d x_{mn}^d \psi_{dk} - \sum_{j \neq k} \phi_{mn}^j \mathbf{U}_{kj}}{\lambda_{mn}^2} \left( \frac{1}{\sigma_{m0}^2} + \frac{\sum_d \psi_{dk}}{\lambda_{mn}^2} \right)^{-1} \\ \sigma_{mn}^2 &= \left( \frac{1}{\sigma_{m0}^2} + \frac{1}{K} \sum_k \frac{\mathbf{U}_{kk}}{\lambda_{mn}^2} \right)^{-1} \end{aligned} \quad (18)$$

For  $p(\boldsymbol{\nu})$ , we have the update rules similar as in [9], that is,

$$\begin{aligned} \gamma_{k1} &= \alpha + \sum_{m=k}^K \sum_{d=1}^D \psi_{dm} + \sum_{m=k+1}^K (D - \sum_{d=1}^D \psi_{dm}) \left( \sum_{i=k+1}^m q_{mi} \right) \\ \gamma_{k2} &= 1 + \sum_{m=k}^K (D - \sum_{d=1}^D \psi_{dm}) q_{mk}. \end{aligned} \quad (19)$$

For  $p(\mathbf{Z})$ , we have the mean-field update equation as

$$\psi_{dk} = \frac{1}{1 + e^{-\vartheta_{dk}}}, \quad (20)$$

where

$$\begin{aligned} \vartheta_{dk} &= \sum_{j=1}^k \mathbb{E}_p[\log v_j] - \mathcal{L}_k^\nu - \sum_{mn} \frac{1}{2\lambda_{mn}^2} \left( (K\sigma_{mn}^2 + (\phi_{mn}^k)^2) \right. \\ &\quad \left. - 2x_{mn}^d \phi_{mn}^k + 2 \sum_{j \neq k} \phi_{mn}^j \phi_{mn}^k \psi_{dj} \right) + \sum_{m,n \in \mathcal{I}_u^m} y_{mn} \mathbb{E}_p[\eta_{mk}] x_{mn}^d. \end{aligned}$$

**Infer  $p(\boldsymbol{\eta})$  and solve for  $\boldsymbol{\omega}$  and  $\boldsymbol{\xi}$ :** We can optimize  $L$  to solve for  $q(\boldsymbol{\eta})$ , which is

$$p(\boldsymbol{\eta}) \propto \pi(\boldsymbol{\eta}) \exp \left\{ \sum_{m,n \in \mathcal{I}_u^m} y_{mn} \omega_{mn} \boldsymbol{\eta}_m^\top \boldsymbol{\psi}^\top \mathbf{x}_{mn} \right\} = \prod_{m=1}^M \pi(\boldsymbol{\eta}_m) \exp \left\{ \boldsymbol{\eta}_m^\top \left( \sum_{n \in \mathcal{I}_u^m} y_{mn} \omega_{mn} \boldsymbol{\psi}^\top \mathbf{x}_{mn} \right) \right\}.$$

Therefore, we can see that although we did not assume  $p(\boldsymbol{\eta})$  is factorized, we can get the induced factorization form  $p(\boldsymbol{\eta}) = \prod_m p(\boldsymbol{\eta}_m)$ , where

$$p(\boldsymbol{\eta}_m) \propto \pi(\boldsymbol{\eta}_m) \exp \left\{ \boldsymbol{\eta}_m^\top \left( \sum_{n \in \mathcal{I}_u^m} y_{mn} \omega_{mn} \boldsymbol{\psi}^\top \mathbf{x}_{mn} \right) \right\}.$$

Here, we assume  $\pi(\boldsymbol{\eta}_m)$  is standard normal. Then, we have  $p(\boldsymbol{\eta}_m) = \mathcal{N}(\boldsymbol{\eta}_m | \boldsymbol{\mu}_m, I)$ , where

$$\boldsymbol{\mu}_m = \sum_{n \in \mathcal{I}_u^m} y_{mn} \omega_{mn} \boldsymbol{\psi}^\top \mathbf{x}_{mn}.$$

Substituting the solution of  $p(\boldsymbol{\eta})$  into the Lagrangian functional, we get the  $M$  independent dual problems

$$\max_{\boldsymbol{\omega}_m} -\frac{1}{2} \boldsymbol{\mu}_m^\top \boldsymbol{\mu}_m + \sum_{n \in \mathcal{I}_u^m} \omega_{mn} \quad \text{s.t.} : 0 \leq \omega_{mn} \leq 1, \forall n \in \mathcal{I}_u^m, \quad (21)$$

which (and its primal form) can be efficiently solved with a binary SVM solver, such as SVM-light.

As we have stated, the hyperparameters  $\sigma_0^2$  and  $\lambda_{mn}^2$  can be set a priori or estimated from the data. The empirical estimation can be easily done with closed form solutions. For MT-iLSVM, we have

$$\sigma_{m0}^2 = \frac{\sum_{n=1}^{N_m} (K \sigma_{mn}^2 + \Phi_{mn}^\top \Phi_{mn})}{K N_m} \quad (22)$$

$$\lambda_{mn}^2 = \frac{\mathbf{x}_{mn}^\top \mathbf{x}_{mn} - 2 \mathbf{x}_{mn}^\top \mathbb{E}_p[\mathbf{Z} \mathbf{w}_{mn}] + \mathbb{E}_p[\mathbf{w}_{mn}^\top \mathbf{U} \mathbf{w}_{mn}]}{D}. \quad (23)$$

## Appendix A.2: Inference for Infinite Latent SVM

In this section, we develop the inference algorithm for iLSVM based on the stick-breaking construction of the IBP prior. The algorithm is outlined in Alg. 2 and detailed below.

Similar as in the inference for MT-iLSVM, we make the additional constraint about the feasible distribution

$$p(\boldsymbol{\nu}, \mathbf{W}, \mathbf{Z}, \boldsymbol{\eta}) = p(\boldsymbol{\eta}) p(\mathbf{W} | \Phi, \Sigma) \prod_n \left( \prod_{k=1}^K p(z_{nk} | \psi_{nk}) \right) \prod_{k=1}^K p(\nu_k | \gamma_k),$$

where  $K$  is the truncation level;  $p(\mathbf{W} | \Phi, \Sigma) = \prod_k \mathcal{N}(\mathbf{W}_{\cdot k} | \Phi_{\cdot k}, \sigma_k^2 I)$ ;  $p(z_{nk} | \phi_{nk}) = \text{Bernoulli}(\phi_{nk})$ ; and  $p(\nu_k | \gamma_k) = \text{Beta}(\gamma_{k1}, \gamma_{k2})$ . Then, we solve the constrained problem using Lagrangian methods with Lagrangian multipliers being  $\boldsymbol{\omega}$ , one for each large-margin constraint, and  $\mathbf{u}$  for the nonnegativity constraints of  $\boldsymbol{\xi}$ . Similarly, let  $L_n(p) \stackrel{\text{def}}{=} \mathbb{E}_p[\log p(\mathbf{x}_n | \mathbf{z}_n, \mathbf{W})]$ . We have

$$L_n(p) = -\frac{\mathbf{x}_n^\top \mathbf{x}_n - 2 \mathbf{x}_n^\top \Phi \mathbb{E}_p[\mathbf{z}_n]^\top + \mathbb{E}_p[\mathbf{z}_n \mathbf{A} \mathbf{z}_n^\top]}{2 \sigma_{n0}^2} - \frac{D \log(2 \pi \sigma_{n0}^2)}{2}, \quad (24)$$

where  $\mathbf{A} \stackrel{\text{def}}{=} \mathbb{E}_p[\mathbf{W}^\top \mathbf{W}]$  is a  $K \times K$  matrix;  $\mathbf{x}_n^\top \Phi \mathbb{E}_p[\mathbf{z}_n]^\top = 2 \sum_k \psi_{nk} (\mathbf{x}_n^\top \Phi_{\cdot k})$ ; and

$$\mathbb{E}_p[\mathbf{z}_n \mathbf{A} \mathbf{z}_n^\top] = 2 \sum_{j < k} \psi_{nj} \psi_{nk} \mathbf{A}_{jk} + \sum_k \psi_{nk} (D \sigma_k^2 + \mathbf{A}_{kk}).$$

The effective discriminant function is  $f(y, \mathbf{x}_n) = \sum_k \mathbb{E}_p[\eta_y^k] \psi_{nk}$ . Again, for computational tractability, we need the lower bound  $\mathcal{L}_k^\nu$  of the term  $\mathbb{E}_p[\log(1 - \prod_{j=1}^k v_j)]$ . Using this lower bound, we can get an upper bound of the KL-divergence term, and we denote the Lagrangian functional by  $L(p, \boldsymbol{\xi}, \boldsymbol{\omega}, \mathbf{u})$ . Then, the inference procedure iteratively solves the following steps:

**Infer  $p(\boldsymbol{\nu})$ ,  $p(\mathbf{Z})$  and  $p(\mathbf{W})$ :** For  $p(\mathbf{W})$ , we have the update rules

$$\begin{aligned} \Phi_{\cdot k} &= \sum_n \frac{\psi_{nk}}{\sigma_{n0}^2} \left( \mathbf{x}_n - \sum_{j \neq k} \psi_{nj} \Phi_{\cdot j} \right) \left( 1 + \sum_n \frac{\psi_{nk}}{\sigma_{n0}^2} \right)^{-1} \\ \sigma_k^2 &= \left( 1 + \sum_n \frac{\psi_{nk}}{\sigma_{n0}^2} \right)^{-1}. \end{aligned} \quad (25)$$

---

**Algorithm 2** Inference Algorithm of iLSVM
 

---

- 1: **Input:** data  $\mathcal{D} = \{(\mathbf{x}_n, y_n)\}_{n \in \mathcal{I}_r} \cup \{\mathbf{x}_n\}_{n \in \mathcal{I}_{\text{st}}}$ , constants  $\alpha$  and  $C$
  - 2: **Output:** distributions  $p(\boldsymbol{\nu})$ ,  $p(\mathbf{Z})$ ,  $p(\mathbf{W})$ ,  $p(\boldsymbol{\eta})$  and hyper-parameters  $\sigma_0^2$  and  $\sigma_{n0}^2$
  - 3: Initialize  $\gamma_{k1} = \alpha$ ,  $\gamma_{k2} = 1$ ,  $\psi_{nk} = 0.5 + \epsilon$ , where  $\epsilon \sim \mathcal{N}(0, 0.001)$ ,  $\Phi_{.k} = 0$ ,  $\sigma_k^2 = \sigma_0^2 = 1$ ,  $\boldsymbol{\mu} = 0$ ,  $\sigma_{n0}^2$  is computed from  $\mathcal{D}$ .
  - 4: **repeat**
  - 5:   **repeat**
  - 6:     update  $(\gamma_{k1}, \gamma_{k2})$  using Eq. (26),  $\forall 1 \leq k \leq K$ ;
  - 7:     update  $\Phi_{.k}$  and  $\sigma_k^2$  using Eq. (25),  $\forall 1 \leq k \leq K$ ;
  - 8:     update  $\psi_{nk}$  using Eq. (27),  $\forall n \in \mathcal{I}_r, \forall 1 \leq k \leq K$ ;
  - 9:     update  $\psi_{nk}$  using Eq. (27), but  $\vartheta_{nk}$  doesn't have the last term,  $\forall n \in \mathcal{I}_{\text{st}}, \forall 1 \leq k \leq K$ ;
  - 10:   **until** relative change of  $L$  is less than  $\tau$  (e.g.,  $1e^{-3}$ ) or iteration number is  $T$  (e.g., 10)
  - 11:   solve the dual problem (28) (or its primal form) using a multi-class SVM learner.
  - 12:   update the hyper-parameters  $\sigma_0^2$  using Eq. (29) and  $\sigma_{n0}^2$  using Eq. (30). (*Optional*)
  - 13: **until** relative change of  $L$  is less than  $\tau'$  (e.g.,  $1e^{-4}$ ) or iteration number is  $T'$  (e.g., 20)
- 

For  $p(\boldsymbol{\nu})$ , we have the update rules similar as in [9], that is,

$$\begin{aligned}\gamma_{k1} &= \alpha + \sum_{m=k+1}^K \sum_{n=1}^N \psi_{nm} + \sum_{m=k+1}^K (N - \sum_{n=1}^N \psi_{nm}) \left( \sum_{i=k+1}^m q_{mi} \right) \\ \gamma_{k2} &= 1 + \sum_{m=k}^K (N - \sum_{n=1}^N \psi_{nm}) q_{mk},\end{aligned}\tag{26}$$

where  $q_{.k}$  is computed in the same way as in Eq. (17). For  $p(\mathbf{Z})$ , the mean-field update equation for  $\psi$  is

$$\psi_{nk} = \frac{1}{1 + e^{-\vartheta_{nk}}},\tag{27}$$

where

$$\begin{aligned}\vartheta_{nk} &= \sum_{j=1}^k \mathbb{E}_p[\log v_j] - \mathcal{L}_k^\nu(p) - \frac{1}{2\sigma_{n0}^2} (D\sigma_k^2 + \Phi_{.k}^\top \Phi_{.k}) \\ &\quad + \frac{1}{\sigma_{n0}^2} \Phi_{.k}^\top \left( \mathbf{x}_n - \sum_{j \neq k} \psi_{nj} \Phi_{.j} \right) + \sum_y \omega_n^y \mathbb{E}_p[\eta_{y_n}^k - \eta_y^k].\end{aligned}$$

For testing data,  $\vartheta_{nk}$  does not have the last term because of the absence of large-margin constraints.

**Infer  $p(\boldsymbol{\eta})$  and solve for  $(\boldsymbol{\xi}, \boldsymbol{\omega}, \mathbf{u})$ :** We can optimize  $L$  to solve for  $q(\boldsymbol{\eta})$ , which is

$$p(\boldsymbol{\eta}) \propto \pi(\boldsymbol{\eta}) \exp \left\{ \boldsymbol{\eta}^\top \left( \sum_{n \in \mathcal{I}_r} \sum_y \omega_n^y \mathbb{E}_p[\mathbf{g}(y_n, \mathbf{x}_n, \mathbf{z}_n) - \mathbf{g}(y, \mathbf{x}_n, \mathbf{z}_n)] \right) \right\}.$$

For the standard normal prior  $\pi(\boldsymbol{\eta})$ , we have that  $q(\boldsymbol{\eta})$  is also normal, with mean

$$\boldsymbol{\mu} = \sum_{n \in \mathcal{I}_r} \sum_y \omega_n^y \mathbb{E}_p[\mathbf{g}(y_n, \mathbf{x}_n, \mathbf{z}_n) - \mathbf{g}(y, \mathbf{x}_n, \mathbf{z}_n)]$$

and identity covariance matrix. Substituting the solution of  $p(\boldsymbol{\eta})$  into the Lagrangian functional, we get the dual problem

$$\max_{\boldsymbol{\omega}} -\frac{1}{2} \boldsymbol{\mu}^\top \boldsymbol{\mu} + \sum_{n \in \mathcal{I}_r} \sum_y \omega_n^y \quad \text{s.t.} \quad 0 \leq \sum_y \omega_n^y \leq C, \forall n \in \mathcal{I}_r,\tag{28}$$

which (and its primal form) can be efficiently solved with a multi-class SVM solver.

Similar as in MT-iLSVM, the hyperparameters  $\sigma_0^2$  and  $\sigma_{n0}^2$  can be set a priori or estimated from the data. The empirical estimation can be easily done with closed form solutions. For iLSVM, we have

$$\sigma_0^2 = \frac{\sum_{k=1}^K (D\sigma_k^2 + \Phi_{.k}^\top \Phi_{.k})}{KD}\tag{29}$$

$$\sigma_{n0}^2 = \frac{\mathbf{x}_n^\top \mathbf{x}_n - 2\mathbf{x}_n^\top \Phi \mathbb{E}_p[\mathbf{z}_n]^\top + \mathbb{E}_p[\mathbf{z}_n \mathbf{A} \mathbf{z}_n^\top]}{D}.\tag{30}$$
